# Supplementary material
Source: PubMed Central journal article supplement (PMC2850013)

# Supplemental data S1

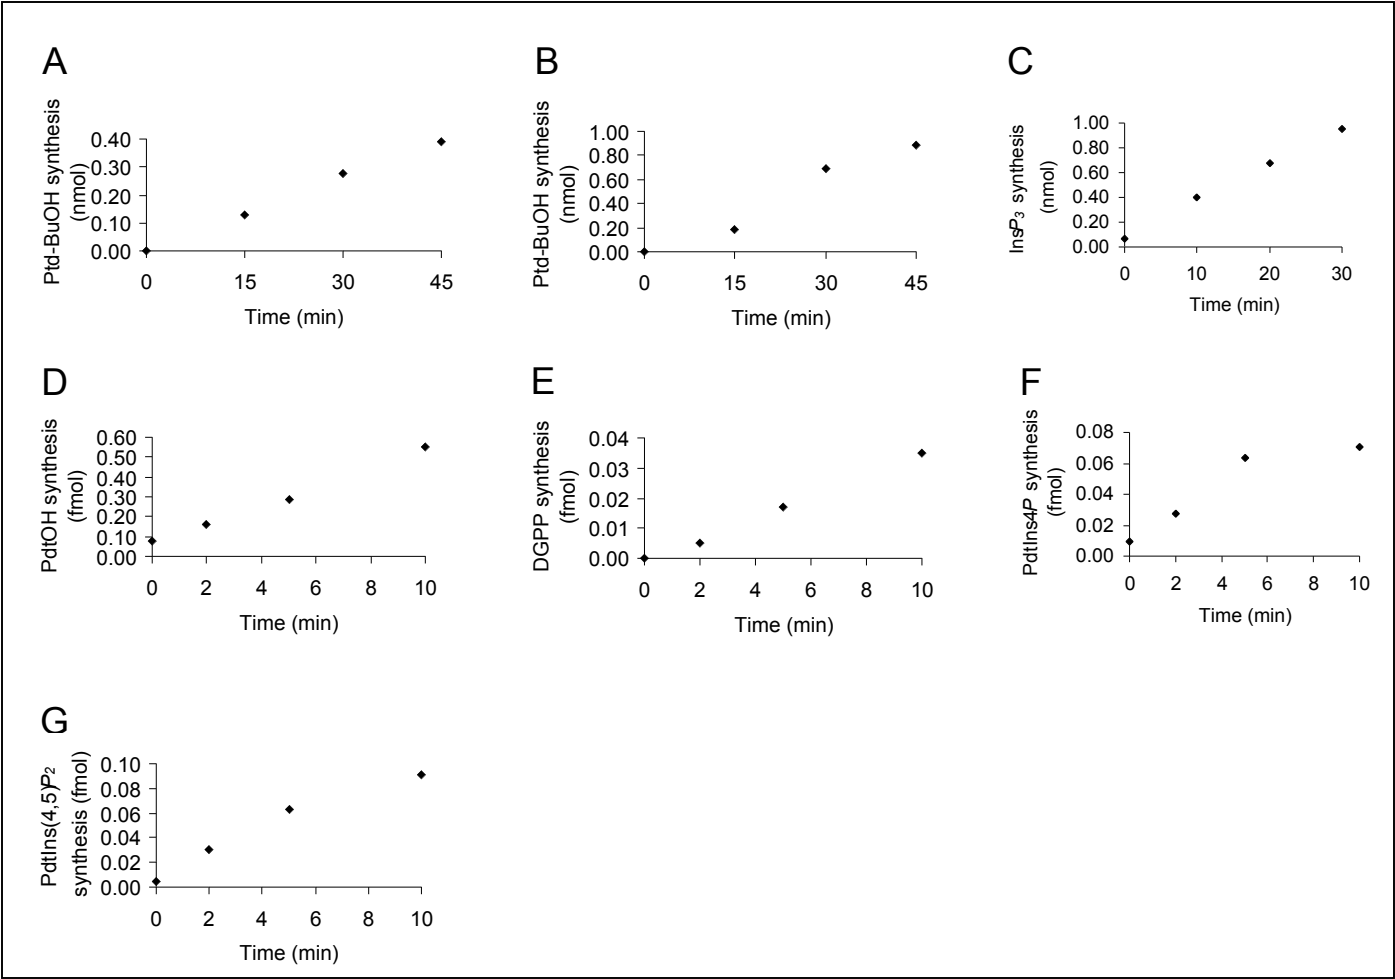

# Supplemental data S2

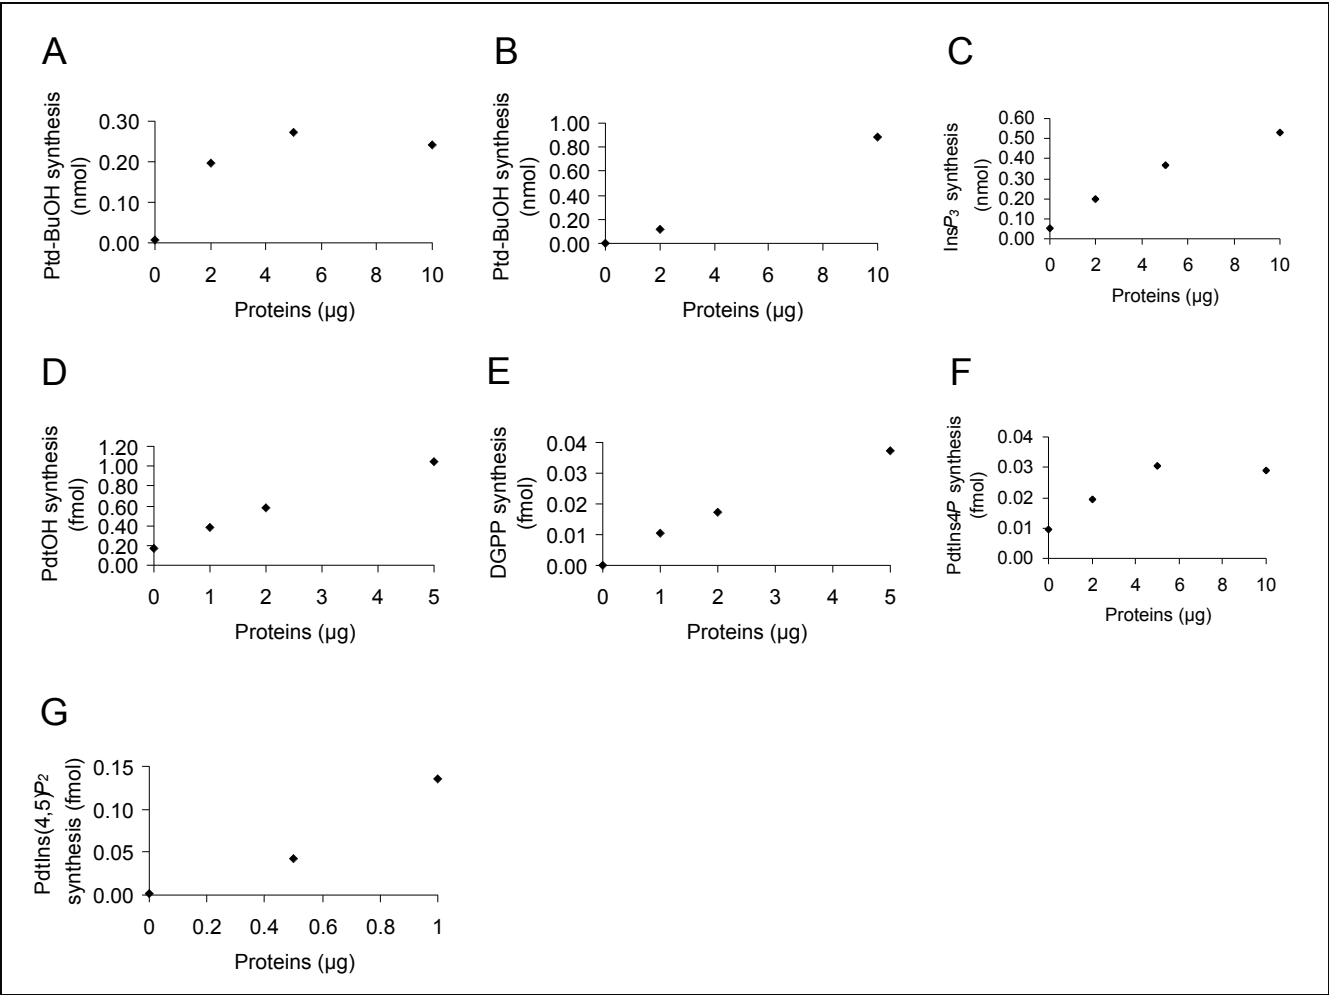

Supplemental data S3

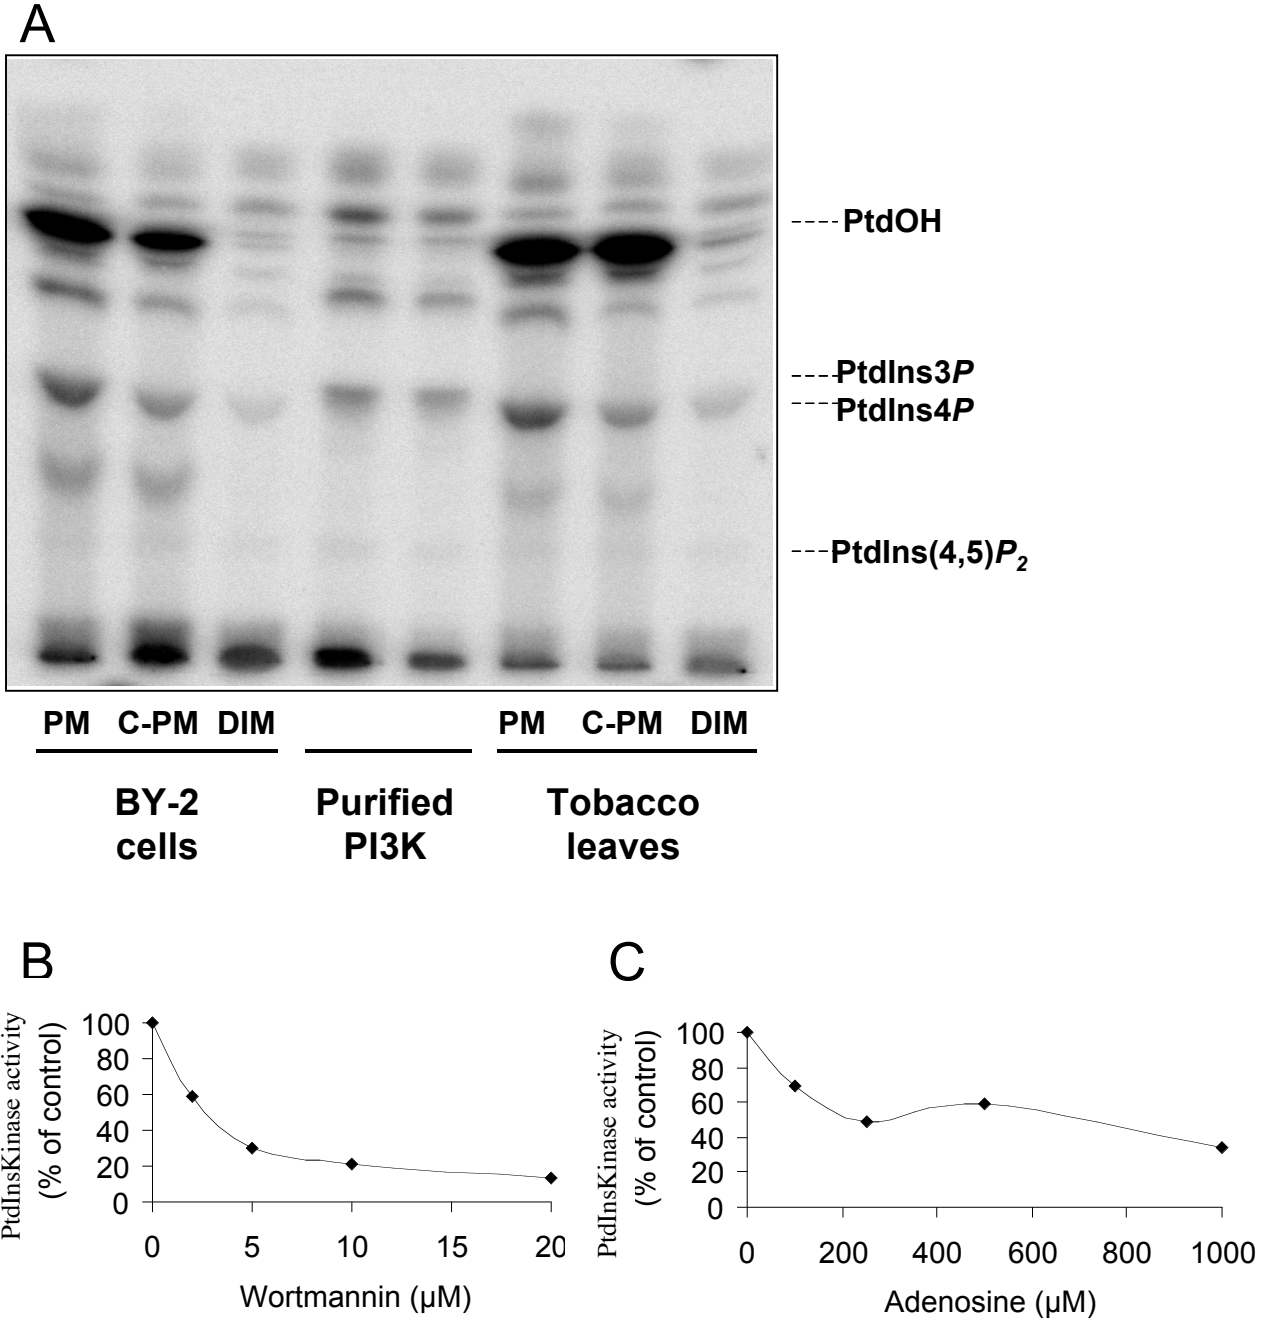

Supplemental data S4

EM controls

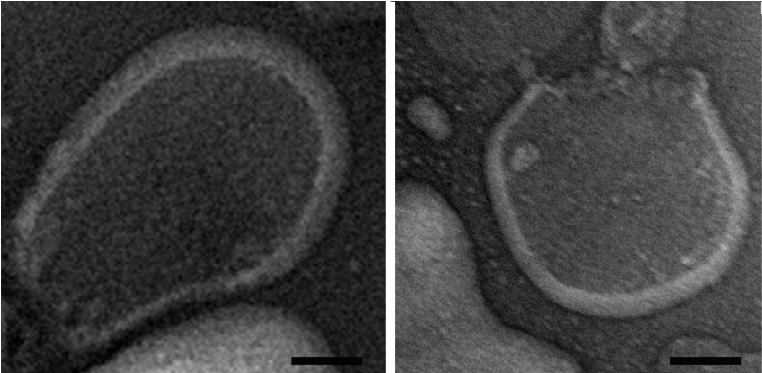

**REM**

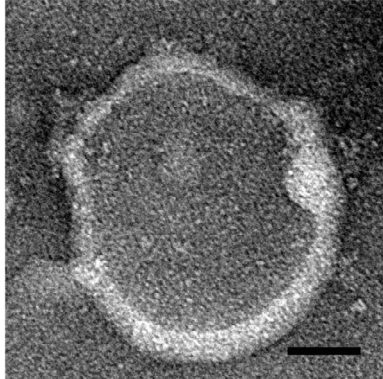

**PtdIns(4, 5)P<sub>2</sub>**

Omission of the primary antibody

## Supplemental data S5

### « PIP strips »; test of cross reactivity toward other lipids

Monoclonal antibody to PtdIns(4,5)P<sub>2</sub> dilution 1/1,000 ; secondary mouse antibody 1/10,000

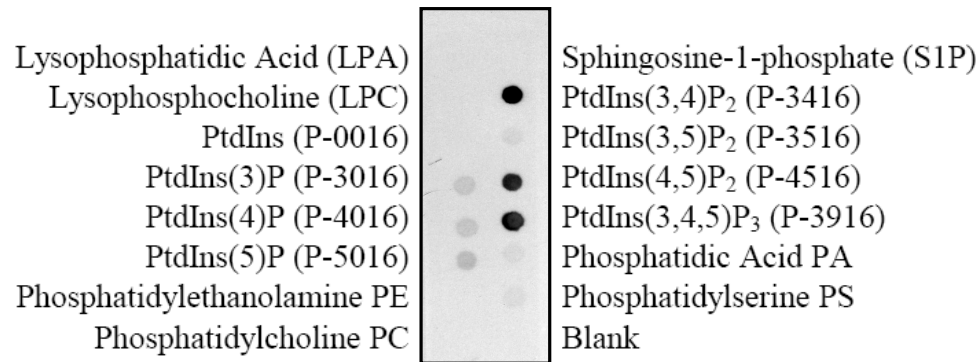

Negative control:

secondary mouse antibody 1/10,000 alone

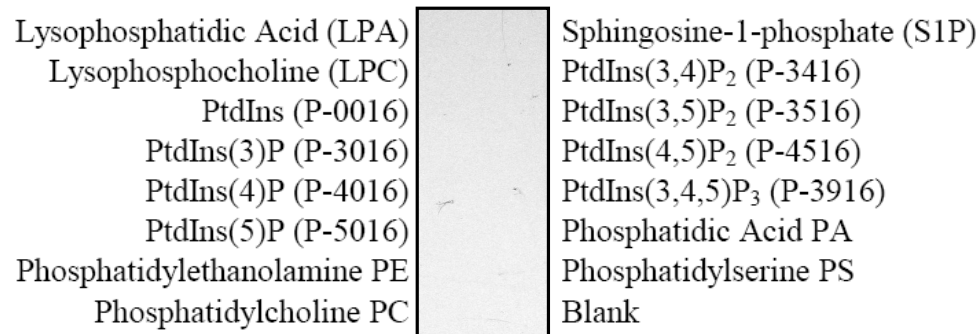

Supplement: pp.109.149823_1.pdf [file pp.109.149823_1.pdf]
